# Supplementary material
Source: MDPI journal article supplement (https://www.mdpi.com/2077-0472/12/1/9)
Supplement: s1 [file s1]

Archive with 2 entries (2 files):
- Figure S1.jpg
- Figure S2.pdf
