# Supplementary material
Source: MDPI journal article supplement (https://www.mdpi.com/2077-0472/12/1/9)

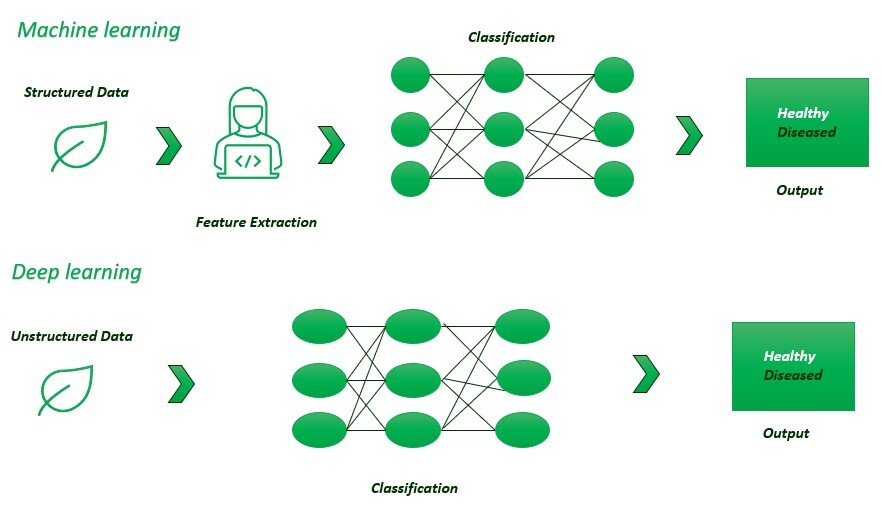

Supplement: s1 [file s1 › Figure S1.jpg]
